# Supplementary material for: Brominated cyclometalated iridium(iii) complexes for mitochondrial immobilization as potential anticancer agents
Source: Royal Society of Chemistry journal article supplement (doi:10.1039/d2dt00587e), 2022-01-01
Supplement: d2dt00587e1.pdf [file d2dt00587e1.pdf]

## Supporting information

### **Brominated cyclometalated iridium(III) complexes for mitochondrial immobilization as potentiated anticancer agents**

Ben Liu,<sup>1</sup> Zhiyin Chen,<sup>1</sup> Yu Li,<sup>1</sup> Xiang-Fu Du,<sup>2</sup> Wenjing Zhang,<sup>2,3</sup> Wei Zhang,<sup>2,3\*</sup>  
Yuxiao Lai,<sup>2,3\*</sup> and Yi Li<sup>1\*</sup>

<sup>1</sup>Key Laboratory of Theoretical Organic Chemistry and Function Molecule, Ministry of Education, School of Chemistry and Chemical Engineering, Hunan University of Science and Technology, Xiangtan 411201, China. E-mail: yli@hnust.edu.cn

<sup>2</sup>Centre for Translational Medicine Research & Development, Shenzhen Institutes of Advanced Technology, Chinese Academy of Sciences, Shenzhen 518055, China;  
Email: zhang.wei@siat.ac.cn; yx.lai@siat.ac.cn

<sup>3</sup>University of Chinese Academy of Sciences, Shenzhen 518055, China.

## Table of Contents

### Supporting Materials and Methods

|                                                                     |     |
|---------------------------------------------------------------------|-----|
| Experimental section.....                                           | S4  |
| Synthesis of the complexes.....                                     | S4  |
| Protein binding assay.....                                          | S7  |
| Cell lines and culture conditions.....                              | S7  |
| Confocal microscopy.....                                            | S7  |
| Cellular uptake.....                                                | S8  |
| Inductively coupled plasma mass spectrometry (ICP-MS) analysis..... | S8  |
| Live–Dead cell staining.....                                        | S8  |
| MMP analysis.....                                                   | S8  |
| ROS analysis.....                                                   | S8  |
| Annexin V/PI assay.....                                             | S6  |
| Tumor cell clone inhibition test.....                               | S9  |
| Antiangiogenic activity assay.....                                  | S9  |
| Inhibition of Thioredoxin Reductase.....                            | S9  |
| Western blotting analysis.....                                      | S9  |
| Immunofluorescence staining analysis.....                           | S10 |
| Cytotoxicity test on MCTSs.....                                     | S10 |

### Supporting Tables and Figures

|                                                                                            |     |
|--------------------------------------------------------------------------------------------|-----|
| <b>Fig. S1</b> HRMS spectrum of complexes <b>Ir1</b> .....                                 | S11 |
| <b>Fig. S2</b> Ion isotopes spectrum of complex <b>Ir1</b> .....                           | S11 |
| <b>Fig. S3</b> <sup>1</sup> H NMR spectrum of complexes <b>Ir1</b> .....                   | S12 |
| <b>Fig. S4</b> <sup>13</sup> C NMR spectrum of complexes <b>Ir1</b> .....                  | S12 |
| <b>Fig. S5</b> HRMS spectrum of complexes <b>Ir2</b> .....                                 | S13 |
| <b>Fig. S6</b> Ion isotopes spectrum of complex <b>Ir2</b> .....                           | S13 |
| <b>Fig. S7</b> <sup>1</sup> H NMR spectrum of complexes <b>Ir2</b> .....                   | S14 |
| <b>Fig. S8</b> <sup>13</sup> C NMR spectrum of complexes <b>Ir2</b> .....                  | S14 |
| <b>Fig. S9</b> HRMS spectrum of complexes <b>Ir3</b> .....                                 | S15 |
| <b>Fig. S10</b> Ion isotopes spectrum of complex <b>Ir3</b> .....                          | S15 |
| <b>Fig. S11</b> <sup>1</sup> H NMR spectrum of complexes <b>Ir3</b> .....                  | S16 |
| <b>Fig. S12</b> <sup>13</sup> C NMR spectrum of complexes <b>Ir3</b> .....                 | S16 |
| <b>Fig. S13</b> UV-vis absorption spectra of <b>Ir1-Ir3</b> .....                          | S17 |
| <b>Fig. S14</b> Confocal images of HeLa cells with <b>Ir1</b> under different conditions.. | S17 |
| <b>Fig. S15</b> Confocal images of HeLa cells with <b>Ir2</b> under different conditions.. | S18 |
| <b>Fig. S16</b> Confocal images of HeLa cells with <b>Ir3</b> under different conditions.. | S19 |
| <b>Table S1</b> Determination of intracellular <b>Ir1-Ir3</b> measured by ICP-MS.....      | S20 |
| <b>Fig. S17</b> Colocalization images of <b>Ir1–Ir3</b> with lysosome dye.....             | S20 |
| <b>Fig. S18</b> Emission spectra of BSA quenched by complexes <b>Ir1-Ir3</b> .....         | S21 |

**Fig. S19** Fluorescence images with calcein AM and propidium iodide.....S22  
**Fig. S20** Growth inhibition of drug-treated HeLa MCTSs.....S22  
**Reference**.....S23

## Experimental section

All solvents and chemicals were commercially received and used without further purification unless otherwise stated. The  $\text{IrCl}_3 \cdot \text{H}_2\text{O}$ , cisplatin 3-(4,5-dimethyl-2-thiazolyl)-2,5-diphenyl-2-H-tetrazolium bromide (MTT), 2',7'-dichlorodihydro fluorescein diacetate (H2DCFDA) and 5,5',6,6'-tetrachloro-1,1',3,3'-tetraethyl benzimidazolylcarbocyanine iodide (JC-1) were purchased from Sigma Aldrich, MitoTracker Deep Red FM (MTDR) and LysoTracker Deep Red FM (LTDR) were obtained from Invitrogen Inc. Calcein-AM/PI cell double stain kit was purchased from Yeason Biotech. The tested compounds were dissolved in dimethylsulfoxide (DMSO) just before the experiments, and if no otherwise specified. All the cell lines were obtained from ATCC and cultured in DMEM (Gibco BRL) medium containing 10% fetal bovine serum (FBS, Gibco BRL), 100 IU/mL streptomycin, 100 IU/mL penicillin, 100 IU/mL streptomycin at 37 °C in 5%  $\text{CO}_2$  and 95% air.

High Resolution Mass Spectrometer (HRMS) spectra were performed by a Bruker TIMSTOF. The quoted  $m/z$  values represent the major peaks in the isotopic distribution. NMR spectra were recorded on a Bruker Biospin Avance III 500 MHz spectrometer. Shifts were referenced relative to the internal solvent signals. Microanalysis (C, H, and N) was carried out using a Vario EL elemental analyzer. Fluorescence was recorded on an FLS 920 combined fluorescence lifetime and steady state spectrometer. UV-vis spectra were recorded on a Varian Cary 300 spectrophotometer.

### Synthesis of the complexes

The ligand 2,2'-bipyridine (bpy), 2-phenylpyridine (ppy) and 2-phenylquinoline (pq) was purchased from (Sigma Aldrich). The ligand 2-(5-bromopyridin-2-yl)benzo[d]thiazole (bpybt)<sup>1</sup> and 2-(4-bromophenyl)benzo[d]thiazole (bpbt)<sup>2</sup> was synthesized according to literature procedures. The iridium(III) complexes **Ir1-Ir3** (Scheme S1) were synthesized according to previous methods with slight changes<sup>3</sup>.

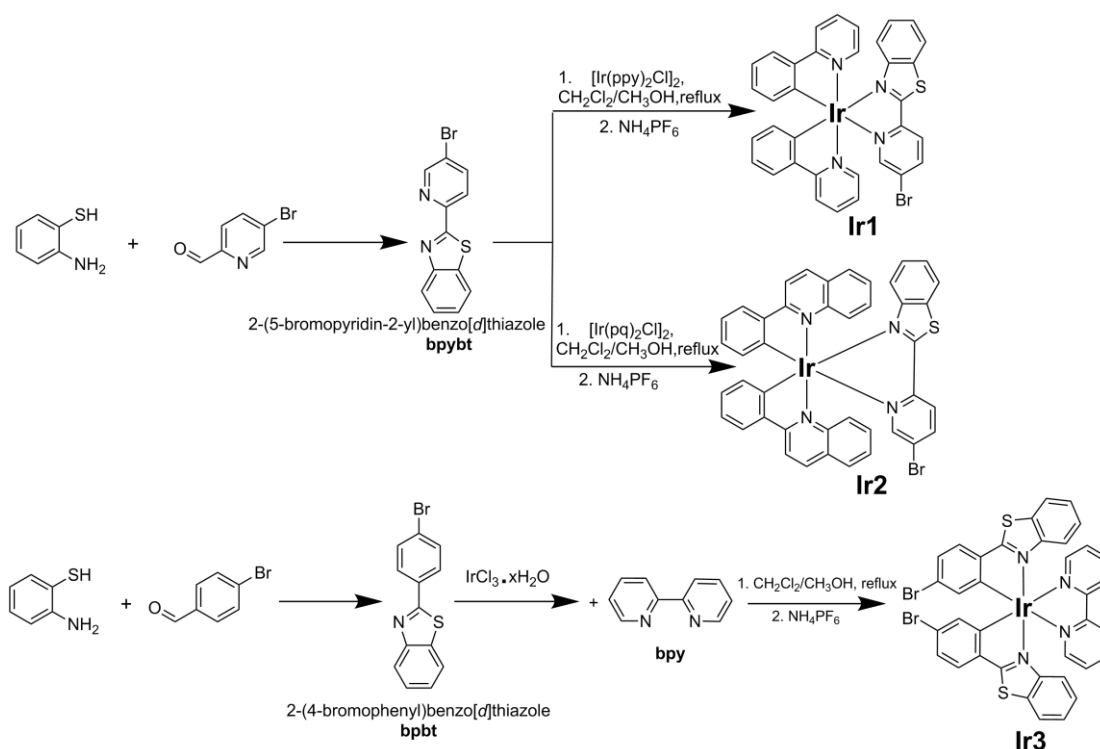

**Scheme S1** Synthesis of ligands and complexes.

Synthetic procedure of the complexes: The iridium(III) precursor (0.2 mmol), **bpybt** or **bpy** (0.4 mmol) were added in methanol/dichloromethane (2:1, v/v). The mixtures were then refluxed for 4 h under nitrogen atmosphere, followed by removing of  $\text{CH}_2\text{Cl}_2$  under reduced pressure, and  $\text{NH}_4\text{PF}_6$  (0.8 mmol) was dropped into this solution. The mixture was stirred for another 3 h and evaporated to dryness. The residue was dissolved in  $\text{CH}_2\text{Cl}_2$ , and purified by column chromatography on silica gel eluted with  $\text{CH}_2\text{Cl}_2/\text{CH}_3\text{OH}$  (20:1, v/v).

$[\text{Ir}(\text{ppy})_2(\text{bpybt})]\text{PF}_6$  (**Ir1**): Complex **Ir1** was obtained as a red powder. Yield: 75.3%.  $^1\text{H}$  NMR (500 MHz, DMSO)  $\delta$  8.79 (d,  $J = 8.6$  Hz, 1H, H<sub>9</sub>), 8.60 (dd,  $J = 8.6$ , 2.1 Hz, 1H, H<sub>1</sub>), 8.41 (d,  $J = 8.1$  Hz, 1H, H<sub>1'</sub>), 8.31 (d,  $J = 8.2$  Hz, 1H, H<sub>11</sub>), 8.22 (d,  $J = 8.1$  Hz, 1H, H<sub>5</sub>), 7.98 (d,  $J = 7.6$  Hz, 1H, H<sub>5'</sub>), 7.97–7.93 (m, 2H, H<sub>10</sub> and H<sub>12</sub>), 7.91 (t,  $J = 7.8$  Hz, 1H, H<sub>4</sub>), 7.82 (d,  $J = 5.7$  Hz, 1H, H<sub>4'</sub>), 7.76 (d,  $J = 5.2$  Hz, 1H, H<sub>15</sub>), 7.73 (d,  $J = 6.0$  Hz, 1H, H<sub>14</sub>), 7.57 (t,  $J = 8.2$  Hz, 1H, H<sub>13</sub>), 7.24 (t,  $J = 8.4$  Hz, 1H, H<sub>3</sub>), 7.15 (dd,  $J = 12.7$ , 7.0 Hz, 2H, H<sub>6</sub> and H<sub>6'</sub>), 7.09 (q,  $J = 7.5$  Hz, 2H, H<sub>8</sub> and H<sub>8'</sub>), 6.97 (q,  $J = 6.2$  Hz, 2H, H<sub>7</sub> and H<sub>7'</sub>), 6.80 (d,  $J = 8.5$  Hz, 1H, H<sub>3'</sub>), 6.25 (d,  $J = 7.2$  Hz, 1H, H<sub>2</sub>), 6.14 (d,  $J = 7.1$  Hz, 1H, H<sub>2'</sub>).  $^{13}\text{C}\{^1\text{H}\}$  NMR (126 MHz, DMSO)  $\delta$  169.63 (C),

166.59 (C), 166.06 (C), 150.39 (C), 150.32 (CH), 150.14 (C), 149.95 (CH), 149.84 (CH), 147.09 (CH), 146.75 (C), 144.29 (C), 143.79 (CH), 142.61 (CH), 139.01 (C), 138.86 (CH), 134.53 (CH), 131.49 (CH), 130.53 (CH), 130.44 (CH), 130.01 (CH), 128.27 (CH), 128.03 (CH), 125.33 (C), 125.17 (C), 125.06 (CH), 124.37 (CH), 123.95 (CH), 122.92 (CH), 122.55 (CH), 121.17 (CH), 120.23 (CH), 119.69 (C). HRMS:  $m/z$  791.0433 [M-PF<sub>6</sub>]<sup>+</sup>. Elemental analysis: calcd (%) for IrC<sub>34</sub>H<sub>23</sub>F<sub>6</sub>N<sub>4</sub>PSBr: C, 43.60; H, 2.47; N, 5.98; found C, 43.43; H, 2.52; N, 5.85.

[Ir(pq)<sub>2</sub>(bpybt)]PF<sub>6</sub> (**Ir2**): Complex **Ir2** was obtained as a red powder. Yield: 67.1%. <sup>1</sup>H NMR (500 MHz, DMSO) δ 8.67 – 8.61 (m, 2H, H<sub>5</sub> and H<sub>5'</sub>), 8.49 (dd,  $J = 8.5, 2.0$  Hz, 1H, H<sub>13</sub>), 8.45 (s, 1H, H<sub>11</sub>), 8.43 (d,  $J = 6.1$  Hz, 1H, H<sub>4</sub>), 8.41 (d,  $J = 10.1$  Hz, 1H, H<sub>4'</sub>), 8.38 – 8.32 (m, 1H, H<sub>12</sub>), 8.30 (d,  $J = 8.2$  Hz, 1H, H<sub>1</sub>), 8.25 (d,  $J = 7.8$  Hz, 1H, H<sub>1'</sub>), 7.99 (d,  $J = 8.0$  Hz, 1H, H<sub>14</sub>), 7.96 (d,  $J = 1.9$  Hz, 1H, H<sub>2</sub>), 7.90 (d,  $J = 7.2$  Hz, 1H, H<sub>2'</sub>), 7.60 (t,  $J = 7.8$  Hz, 1H, H<sub>3</sub>), 7.55 (d,  $J = 8.9$  Hz, 1H, H<sub>3'</sub>), 7.46 (d,  $J = 7.4$  Hz, 1H, H<sub>17</sub>), 7.44 – 7.39 (m, 1H, H<sub>16</sub>), 7.36 (t,  $J = 8.2$  Hz, 1H, H<sub>15</sub>), 7.21 (ddd,  $J = 9.0, 7.5, 5.1$  Hz, 3H, H<sub>9</sub>, H<sub>7</sub> and H<sub>9'</sub>), 6.99 (d,  $J = 8.9$  Hz, 1H, H<sub>7'</sub>), 6.88 (ddd,  $J = 20.5, 14.7, 8.5$  Hz, 4H, H<sub>8</sub>, H<sub>10</sub>, H<sub>8'</sub> and H<sub>10'</sub>), 6.47 (d,  $J = 7.6$  Hz, 1H, H<sub>6</sub>), 6.38 (d,  $J = 7.5$  Hz, 1H, H<sub>6'</sub>). <sup>13</sup>C{<sup>1</sup>H} NMR (126 MHz, DMSO) δ 170.75 (C), 169.42 (C), 169.07 (C), 150.16 (CH), 149.38 (C), 148.59 (C), 147.74 (CH), 147.39 (C), 146.93 (CH), 146.63 (C), 145.85 (CH), 143.51 (CH), 141.51 (CH), 141.09 (CH), 134.21 (C), 134.06 (C), 133.59 (CH), 131.96 (CH), 131.64 (CH), 131.48 (CH), 131.39 (C), 130.08 (CH), 130.04 (CH), 129.06 (CH), 128.76 (CH), 128.05 (C), 128.00 (C), 127.89 (CH), 127.56 (CH), 125.56 (CH), 125.26 (C), 124.88 (C), 123.96 (CH), 123.91 (CH), 123.64 (CH), 121.13 (CH), 118.63 (CH), 118.03 (C). HRMS:  $m/z$  891.0755 [M-PF<sub>6</sub>]<sup>+</sup>. Elemental analysis: calcd (%) for IrC<sub>42</sub>H<sub>27</sub>F<sub>6</sub>N<sub>4</sub>PSBr: C, 48.65; H, 2.62; N, 5.40; found C, 48.51; H, 2.75; N, 5.31.

[Ir((bpbtt)<sub>2</sub>(ppy))]PF<sub>6</sub> (**Ir3**): Complex **Ir3** was obtained as a yellow powder. Yield: 52.4%. <sup>1</sup>H NMR (500 MHz, DMSO) δ 8.85 (d,  $J = 8.2$  Hz, 2H, H<sub>11</sub> and H<sub>11'</sub>), 8.34 (td,  $J = 8.0, 1.5$  Hz, 2H, H<sub>8</sub> and H<sub>8'</sub>), 8.28 (d,  $J = 7.7$  Hz, 2H, H<sub>4</sub> and H<sub>4'</sub>), 8.11 (dd,  $J = 5.5, 0.8$  Hz, 2H, H<sub>7</sub> and H<sub>7'</sub>), 8.04 (d,  $J = 8.2$  Hz, 2H, H<sub>1</sub> and H<sub>1'</sub>), 7.80 (ddd,

$J = 7.5, 5.6, 1.1$  Hz, 2H, H<sub>5</sub> and H<sub>5'</sub>), 7.49–7.44 (m, 2H, H<sub>6</sub> and H<sub>6'</sub>), 7.38 (dd,  $J = 8.2, 1.9$  Hz, 2H, H<sub>10</sub> and H<sub>10'</sub>), 7.24–7.18 (m, 2H, H<sub>2</sub> and H<sub>2'</sub>), 6.30 (d,  $J = 1.9$  Hz, 2H, H<sub>3</sub> and H<sub>3'</sub>), 6.07 (d,  $J = 8.5$  Hz, 2H, H<sub>9</sub> and H<sub>9'</sub>). <sup>13</sup>C{<sup>1</sup>H} NMR (126 MHz, DMSO)  $\delta$  180.28 (C), 155.83 (C), 152.11 (C), 150.67 (CH), 148.14 (C), 140.74 (CH), 139.27 (C), 134.46 (CH), 131.35 (CH), 129.36 (CH), 128.99 (C), 128.41 (CH), 126.43 (CH), 126.37 (CH), 126.27 (C), 124.96 (CH), 124.90 (CH), 116.61 (CH). HRMS:  $m/z$  926.9246 [M–PF<sub>6</sub>]<sup>+</sup>. Elemental analysis: calcd (%) for IrC<sub>36</sub>H<sub>22</sub>F<sub>6</sub>N<sub>4</sub>PS<sub>2</sub>Br<sub>2</sub>: C, 40.35; H, 2.07; N, 5.23; found C, 40.16; H, 2.24; N, 5.11.

#### Protein binding assay <sup>4</sup>

Measure the fluorescence emission spectrum after BSA (10  $\mu$ M) reacts with different concentrations (1–10  $\mu$ M) of **Ir1-Ir3** for 30 min,  $\lambda_{\text{ex}} = 280$  nm.

Stern-Volmer equation:  $F_0 / F = 1 + K_{\text{sv}} [Q] = 1 + K_{\text{q}}\tau_0 [Q]$

Scatchard equation:  $\log [(F_0 - F) / F] = \log K_{\text{b}} + n \log [Q]$

$F_0$  and  $F$  are used to represent the fluorescence intensity of BSA in the absence and presence of compound [Q],  $K_{\text{sv}}$  is the quenching constant,  $K_{\text{q}}$  is the quenching rate constant, and the average lifetime of the fluorophore in the absence of a quencher is  $\tau_0$  ( $10^{-8}$  s).

#### Cell lines and culture conditions

Hela, 143B, MCF-7, A3475, C28/I2, BMSC and EA.hy926 were purchased from ATCC. Various cells were cultured in DMEM (Gibco BRL) or RPMI 1640 (Gibco BRL) medium containing 10% fetal bovine serum (FBS, Gibco BRL), 100 IU/mL penicillin, and 100 IU/mL streptomycin at 37 °C in 5% CO<sub>2</sub> and 95% air.

#### Confocal microscopy

HeLa cells are typically seeded at a density at the bottom of 8 well chamber slide at a density of  $4 \times 10^4$  cells/mL for confocal microscope imaging. After incubating in a 5% CO<sub>2</sub>/95% air incubator at 37 °C for 24 h. The HeLa cells were co-stained with complexes **Ir1-Ir3** (10  $\mu$ M) and commercial mitochondrial-specific dye (MTG or MTDR: 100 nM) or lysosome-specific dye (LTG or LTDR: 100 nM) for 20 min. Cells were washed with PBS for three times and visualized by confocal microscopy (Nikon

Eclipse Ti2) immediately. The iridium complexes excited at 405 nm, MTG or LTG excited at 488 nm, MTDR or LTDR excited at 630 nm. Emission was collected at  $650 \pm 20$  nm (**Ir1** and **Ir2**),  $570 \pm 20$  nm (**Ir3**),  $520 \pm 15$  nm (MTG or LTG) and  $660 \pm 15$  nm (MTDR or LTDR).

### **Cellular uptake**

After the HeLa cells were incubated with CCCP (30  $\mu$ M) and Chloroquine (50  $\mu$ M) for 1 h, the culture medium was aspirated, and the culture medium containing **Ir1-Ir3** (10  $\mu$ M) was incubated for 20 min. In addition, the other cells were pretreated at 4  $^{\circ}$ C and then incubated with **Ir1-Ir3** (10  $\mu$ M) for 20 min. The cells were washed three times with PBS and visualized by confocal microscopy.

### **Inductively coupled plasma mass spectrometry (ICP-MS) analysis**

The intracellular iridium contents of **Ir1-Ir3** were determined by a method reported in literature with slight modifications.<sup>3</sup> Briefly, HeLa cells were grown in 10 cm culture dishes and incubated for 24 h. The medium was removed and replaced with medium-DMSO (99:1 v/v) containing **Ir1-Ir3** (10  $\mu$ M) under different conditions. After 1 h incubation, the cells were collected, counted, and digested with HNO<sub>3</sub> (65%, 0.5 mL) at 60  $^{\circ}$ C for 1 h. The solution was then diluted to a final volume of 10 mL with Milli-Q water. The concentration of iridium was measured using the ICP-MS.

### **Live–Dead cell staining**

After the HeLa cells were incubated with **Ir1-Ir3** (10  $\mu$ M) and cisplatin (50  $\mu$ M) for 5 h, they were stained with Calcein-AM and PI, observed and photographed through a fluorescence microscope.

### **MMP analysis**

HeLa cells are incubated with the designated **Ir1-Ir3** for 5 h, cells were harvested and stained with 5  $\mu$ g/mL JC-1 for 20 min at 37  $^{\circ}$ C in the dark, and analyzed immediately by flow cytometry. Data were analyzed with FlowJo software.

### **ROS analysis**

HeLa cells are incubated with the designated **Ir1-Ir3** for 5 h, cells were



harvested and stained with 10  $\mu$ M H<sub>2</sub>DCFDA for 30 min at 37 °C in the dark. and analyzed immediately by flow cytometry.

#### **Annexin V/PI assay**

HeLa cells were incubated with the designated iridium **Ir1-Ir3** for 5 h, cells were harvested and stained with 5  $\mu$ L Annexin V-FITC and 10  $\mu$ L PI for 30 min in the dark, and analyzed immediately by flow cytometry.

#### **Tumor cell clone inhibition test**

HeLa cells seeded in a 6-well plate for 24 h at 37°C and 5% CO<sub>2</sub> environment, complexes **Ir1-Ir3** (50 nM) was then added to the experimental group, and continued to incubate for 24 h, changed to adding fresh medium and continued incubating for 7 days. Use 4% paraformaldehyde solution to fix the cells at 4 °C for 1 h, then used crystal violet solution to stain cell for 15 min.

#### **Antiangiogenic activity assay**

Mix the Matrigel with FBS-free DMEM (v/v=1:1), place the mixture in the 48-well plate with a pipette, and place the 48-well plate in 37 °C incubator for 30-40 min. Prepare EA.hy926 cell suspension for FBS-free DMEM and adjust the cell suspension to a concentration of 10 $\times$ 10<sup>4</sup> cells/well. Cells were incubated with a certain concentration of iridium complexes for 5 h, and control cells were incubated with 1%DMSO (v/v).

#### **Inhibition of TrxR**

The TrxR enzyme activity was performed as previously described <sup>5</sup>, and determined using a specific kit (BC1150; Solarbio Life Sciences, Beijing, China).

#### **Western blotting analysis**

Western blotting was performed as previously described <sup>6</sup>. Briefly, HeLa cells seeded in 6 cm culture dishes were exposed to **Ir2** at 2  $\mu$ M, 4  $\mu$ M or 8  $\mu$ M for 12 h. Cells were lysed in radio-immunoprecipitation assay (RIPA) buffer. The proteins were separated on SDS-polyacrylamide gel electrophoresis and then transferred onto polyvinylidene difluoride membranes. The membrane was blocked and incubated with the primary antibodies at 4 °C overnight. After a subsequent washing step, the

membrane was incubated with the secondary antibody for 30 min. The immunoreactivity was detected using the enhanced chemiluminescence detection kit. Images were captured using a CLINX 6300 imaging station and analyzed manually with Alpha Innotech software.

### **Immunofluorescence staining analysis**

HeLa cells were treated with **Ir2** (4  $\mu\text{M}$ ) for 24 h, and then 4% paraformaldehyde was added for 20 min. The cells were washed with PBS three times, treated with Triton X-100 (0.2%) to break the membrane for 15 min, and washed with PBS three times. Then, 10% goat serum was used to block for 1 h, and added with primary antibody overnight at 4  $^{\circ}\text{C}$ . After a subsequent washing step, the fluorescent secondary antibody was added for 40 min at room temperature, and then stained nucleus with DAPI and analysed with confocal microscopy.

### **Cytotoxicity test on MCTSs**

HeLa MCTSs (diameter .400 mm) were treated by carefully replacing 50% of the medium with drug-supplemented standard medium by using an eight-channel pipette. In parallel, 50% of the solvent-containing medium were replaced by solvent-free medium for the untreated MCTSs. Three MCTSs were incubated with **Ir2** at different concentrations (2/4/8  $\mu\text{M}$ ), and cisplatin (10  $\mu\text{M}$ ), and the DMSO volume was less than 1% (v/v). Take pictures and record every 24 h.

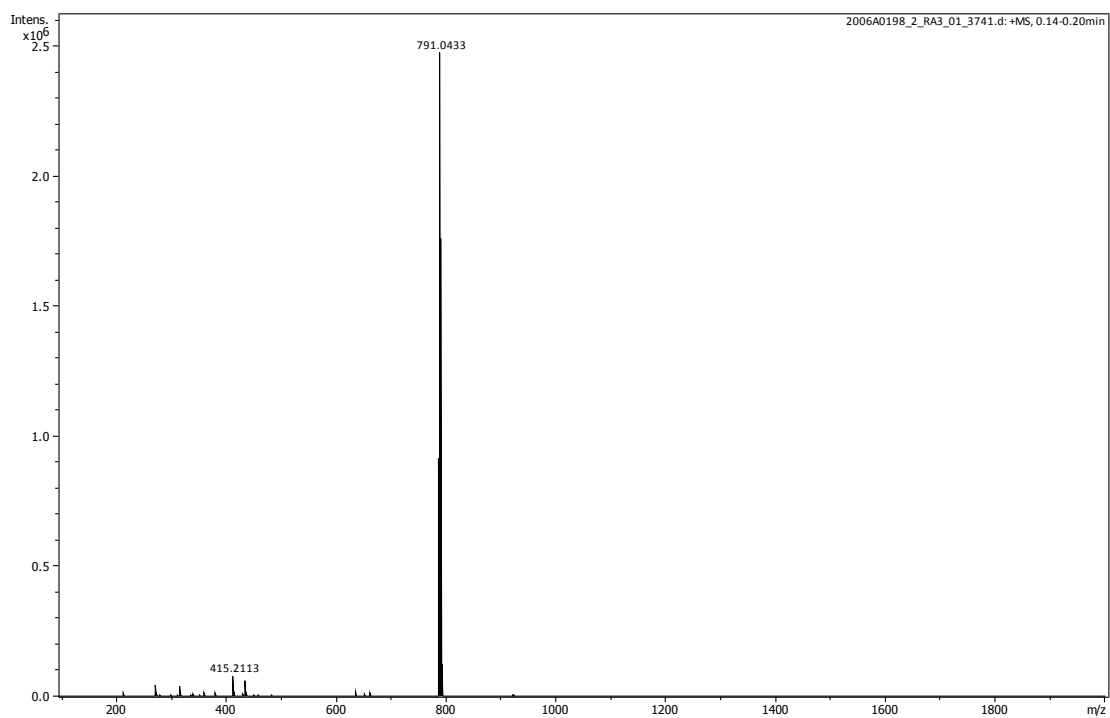

**Fig. S1** HRMS spectrum of complex **Ir1**.

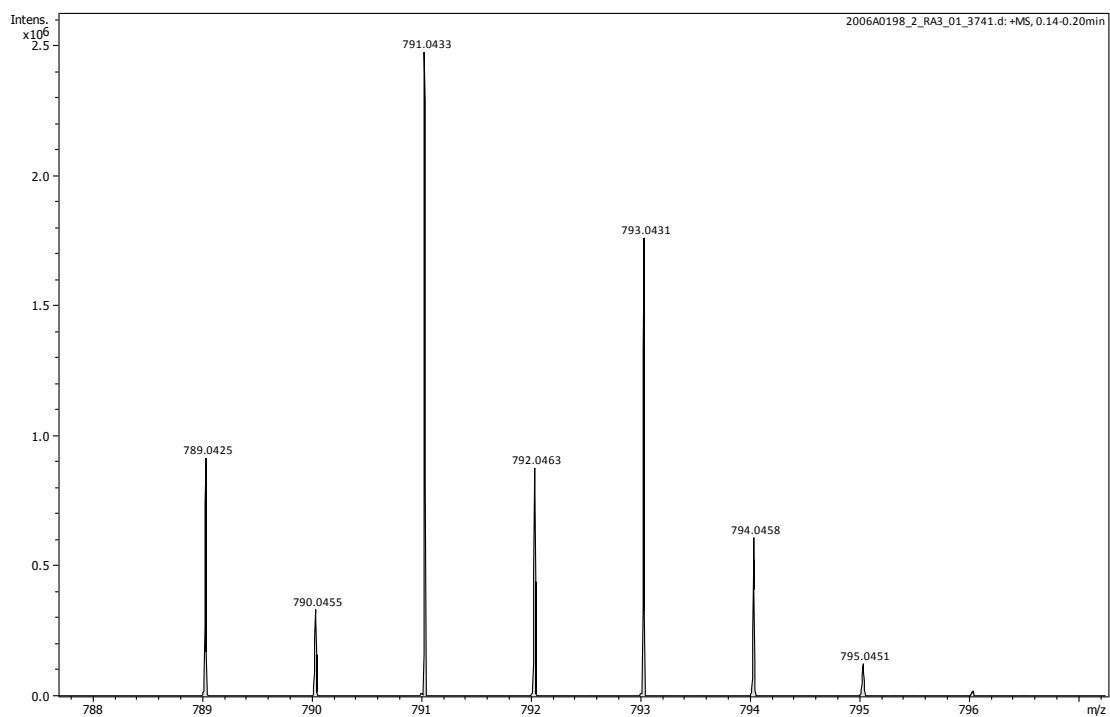

**Fig. S2** Ion isotopes spectrum of complex **Ir1**.

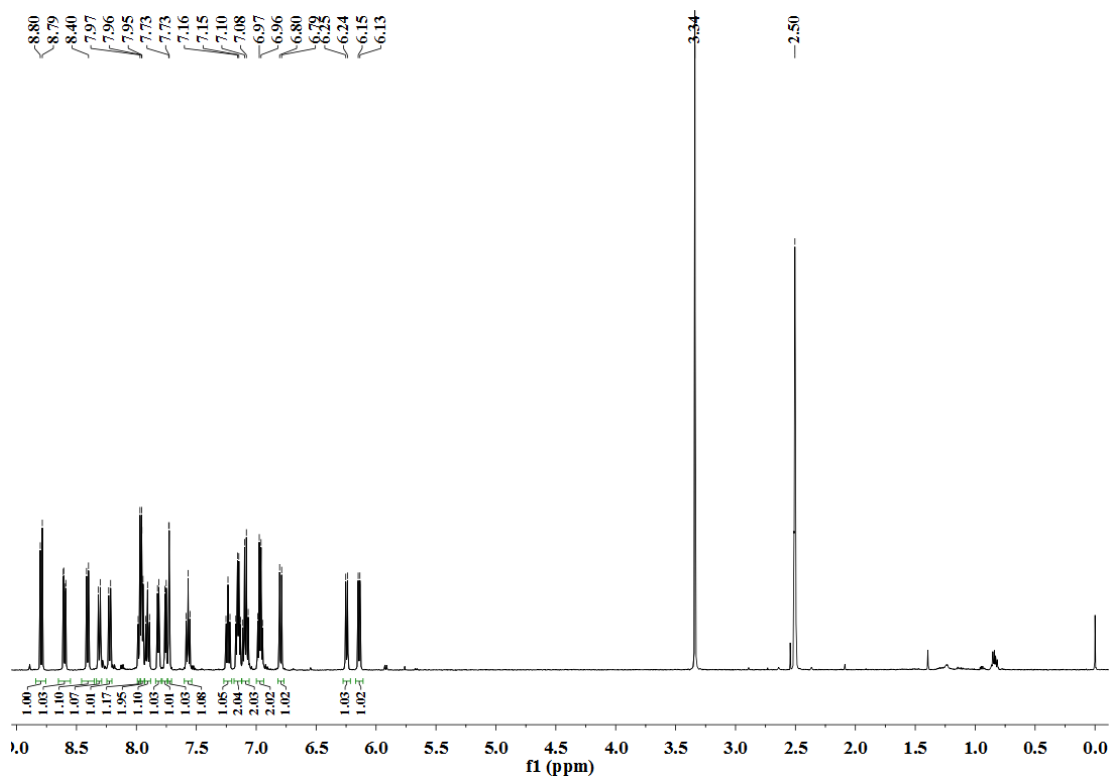

Fig. S3  $^1\text{H}$  NMR spectrum of complex **Ir1**.

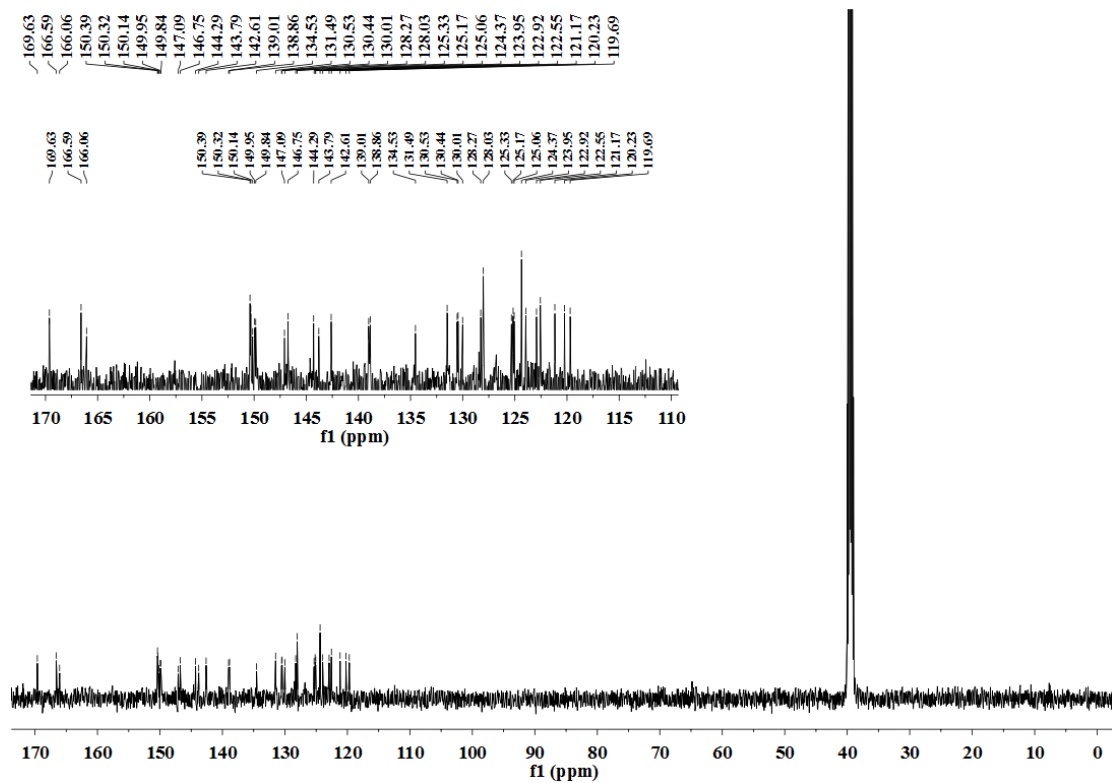

Fig. S4  $^{13}\text{C}$  NMR spectrum of complex **Ir1**.

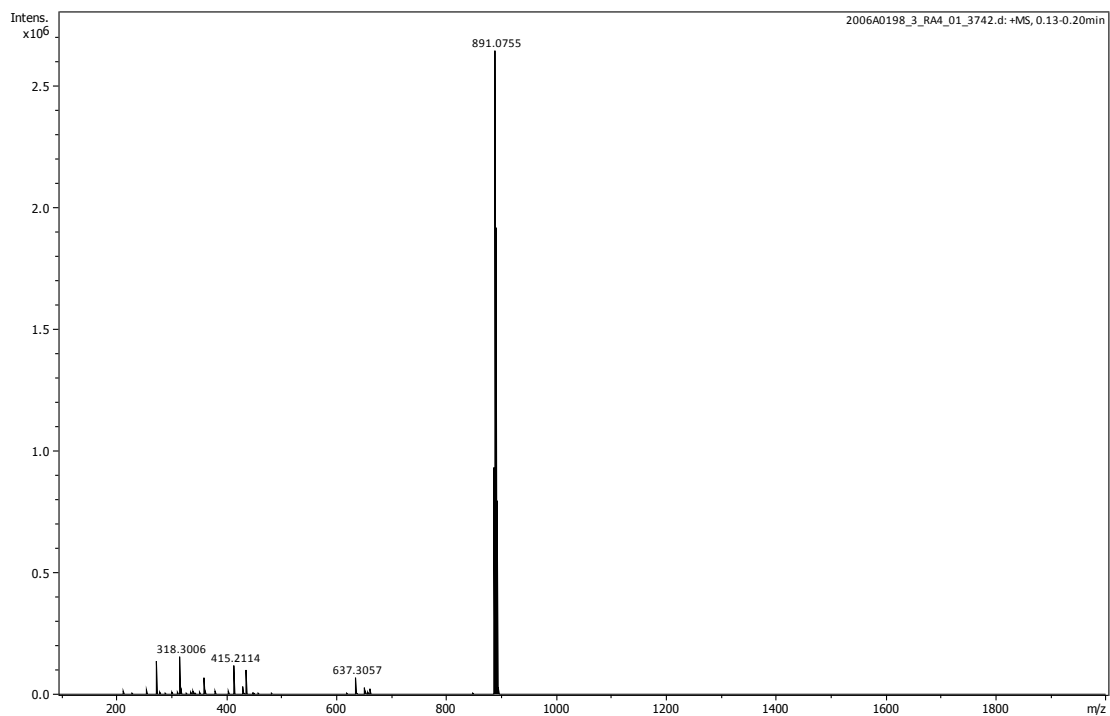

**Fig. S5** HRMS spectrum of complex **Ir2**.

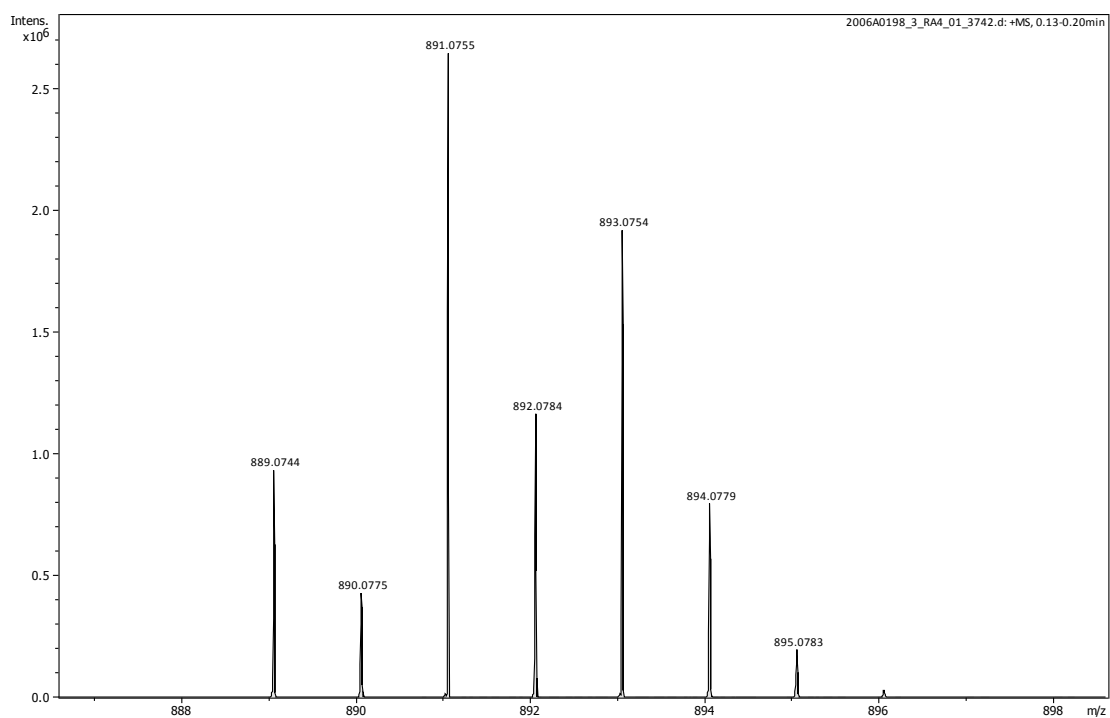

**Fig. S6** Ion isotopes spectrum of complex **Ir2**.

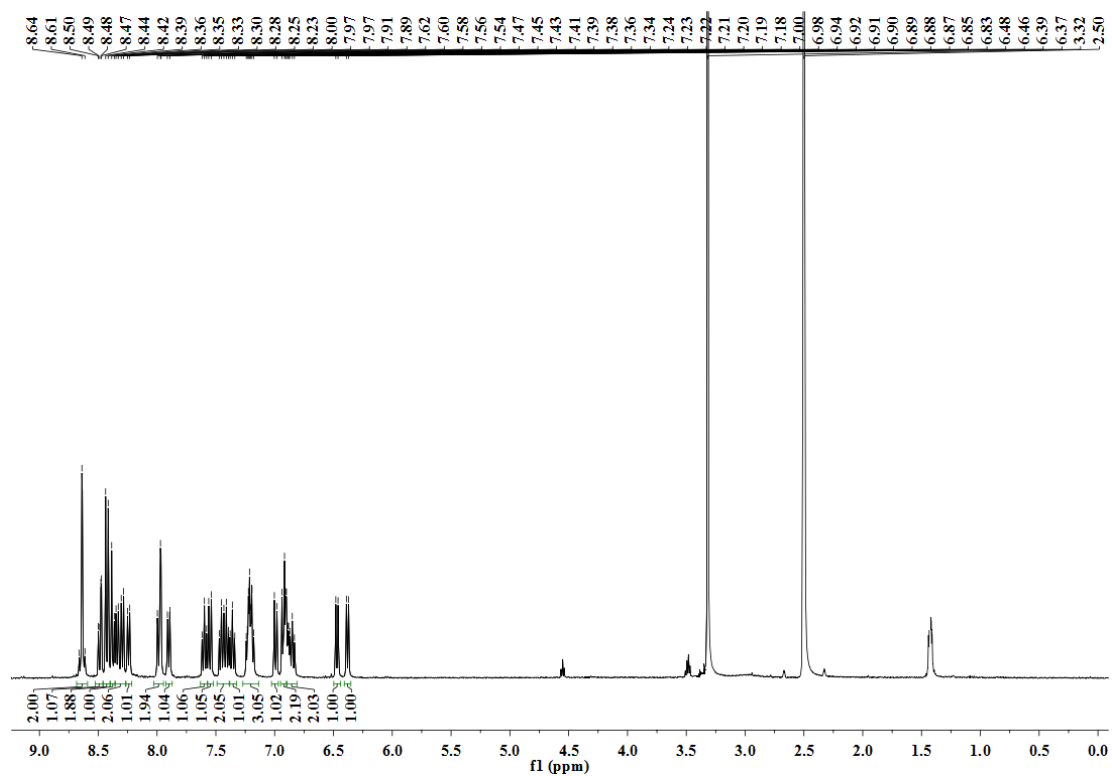

**Fig. S7**  $^1\text{H}$  NMR spectrum of complex **Ir2**.

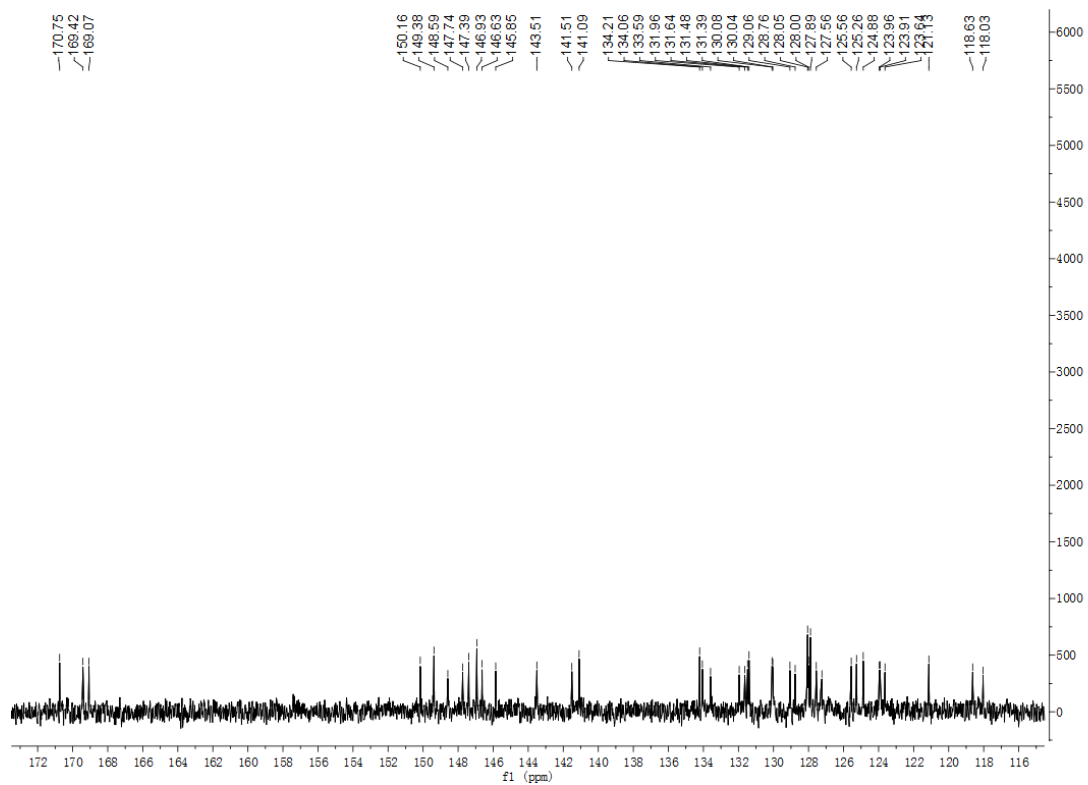

**Fig. S8**  $^{13}\text{C}$  NMR spectrum of complex **Ir2**.

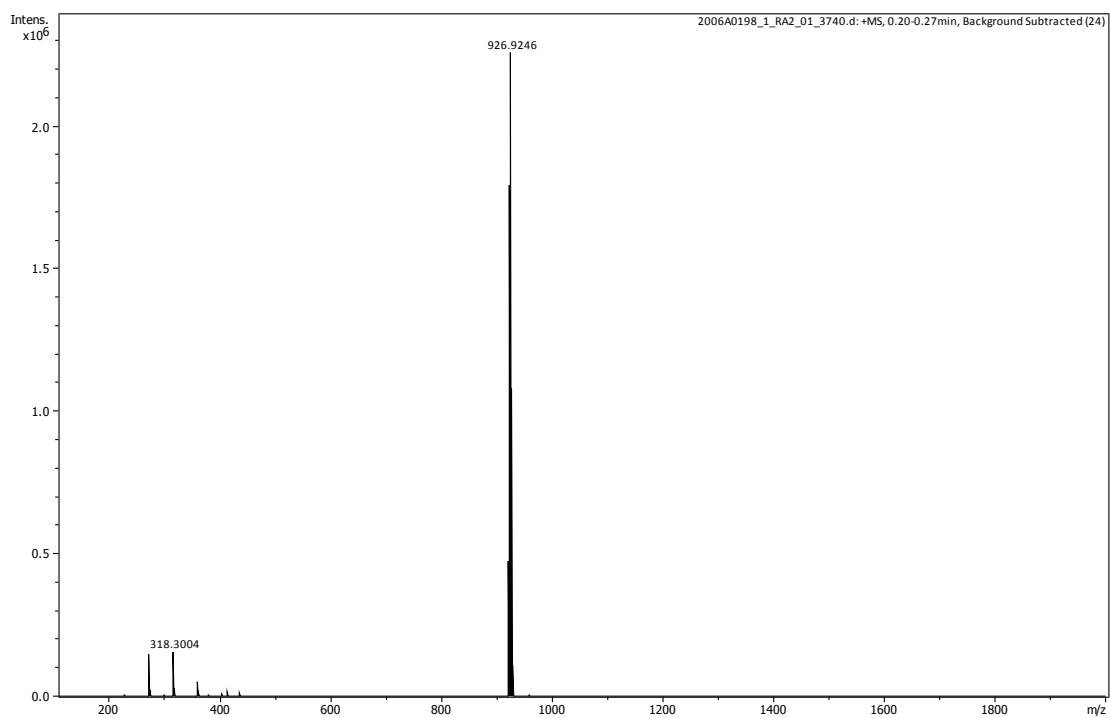

**Fig. S9** HRMS spectrum of complex **Ir3**.

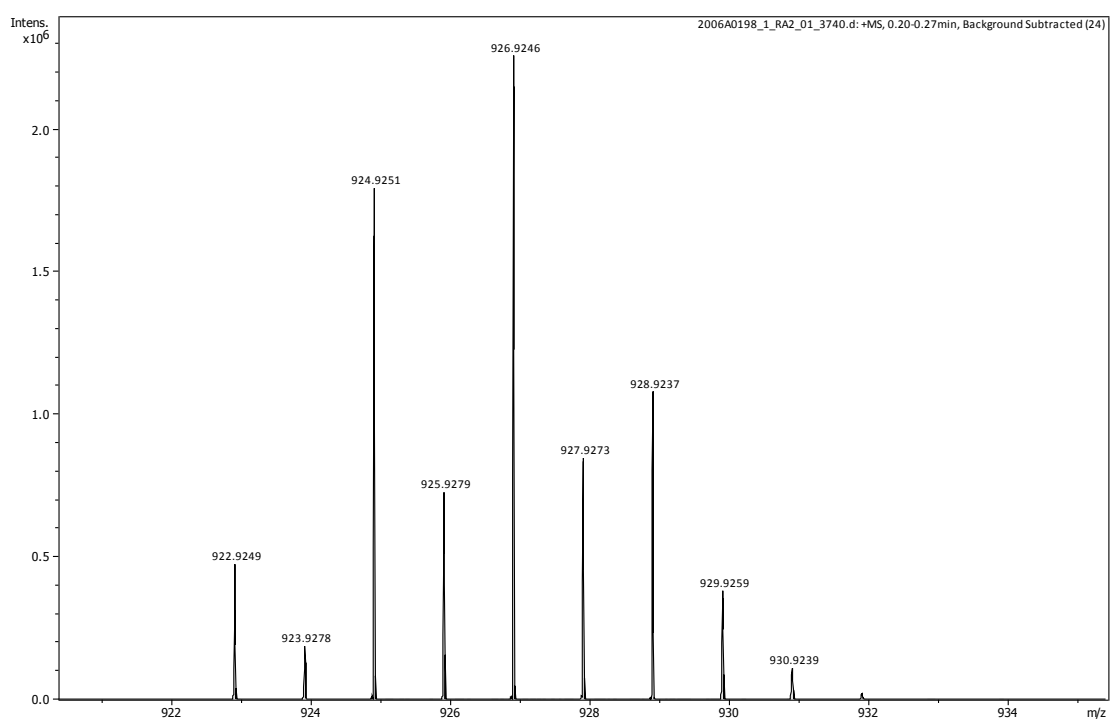

**Fig. S10** Ion isotopes spectrum of complex **Ir3**.

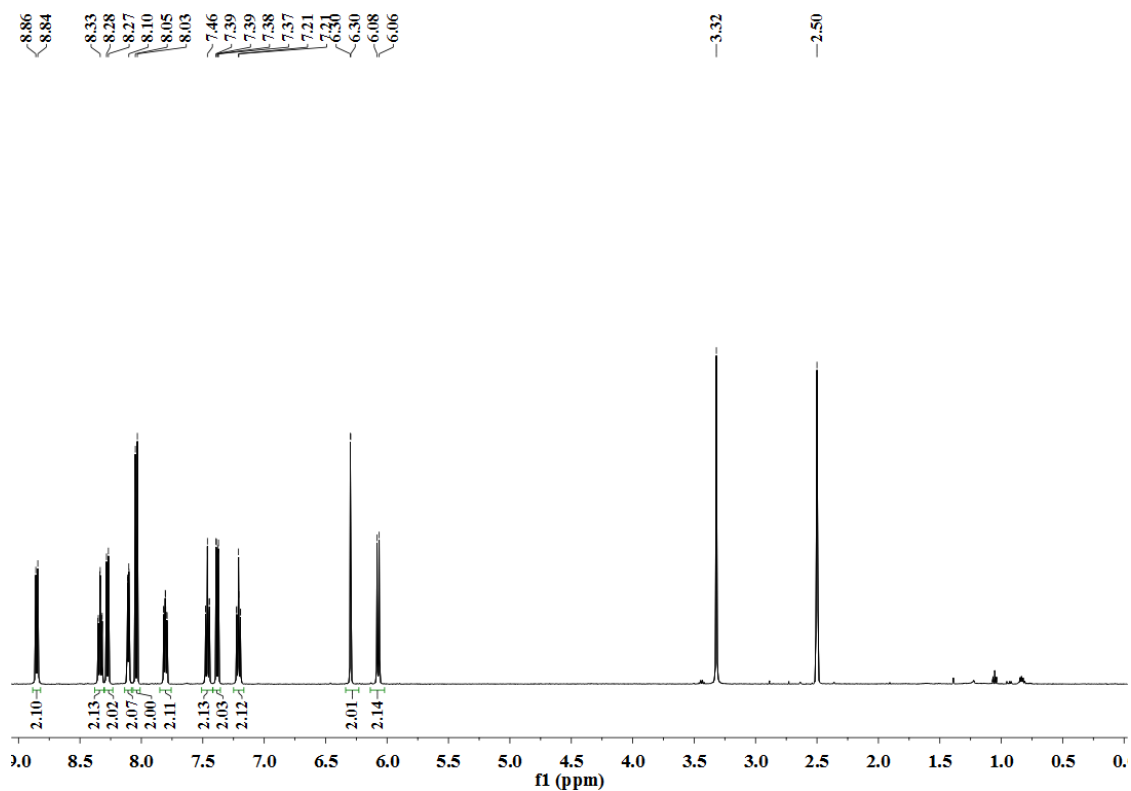

Fig. S11  $^1\text{H}$  NMR spectrum of complex **Ir3**.

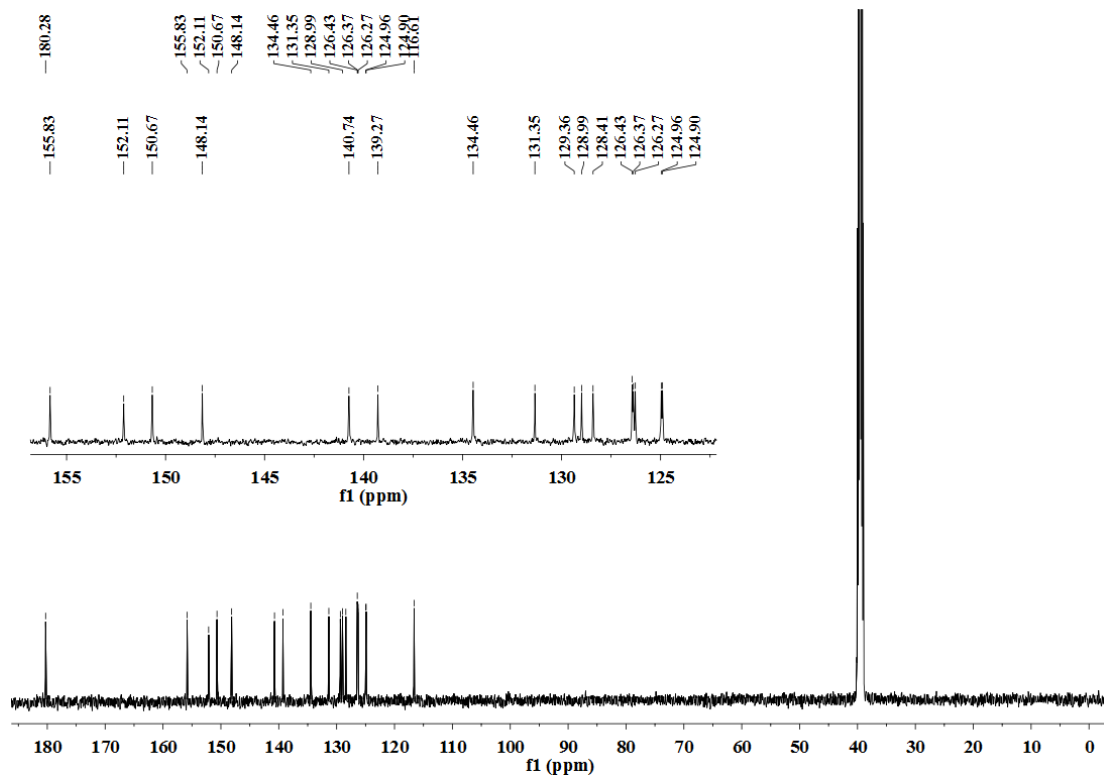

Fig. S12  $^{13}\text{C}$  NMR spectrum of complex **Ir3**.



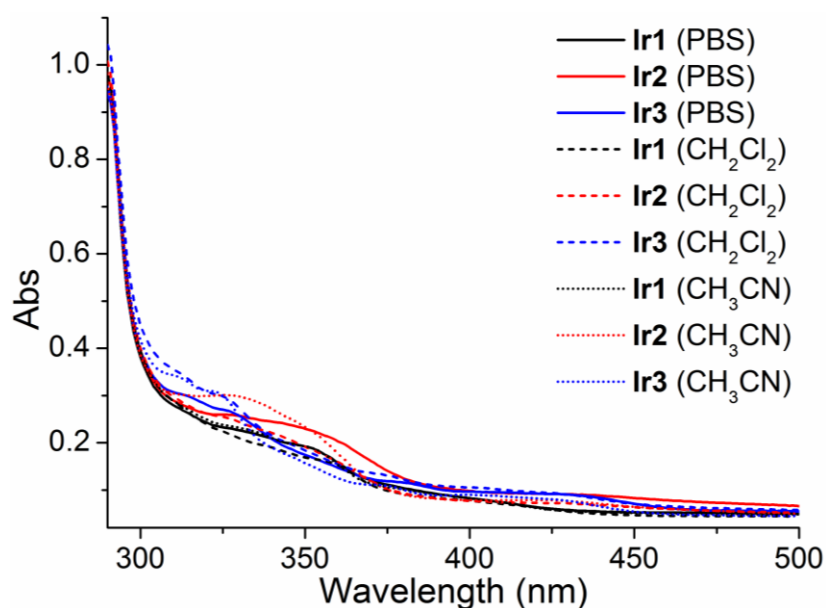

**Fig. S13** UV-vis absorption spectra of **Ir1-Ir3** (20  $\mu$ M) in PBS, CH<sub>2</sub>Cl<sub>2</sub> and CH<sub>3</sub>CN, respectively.

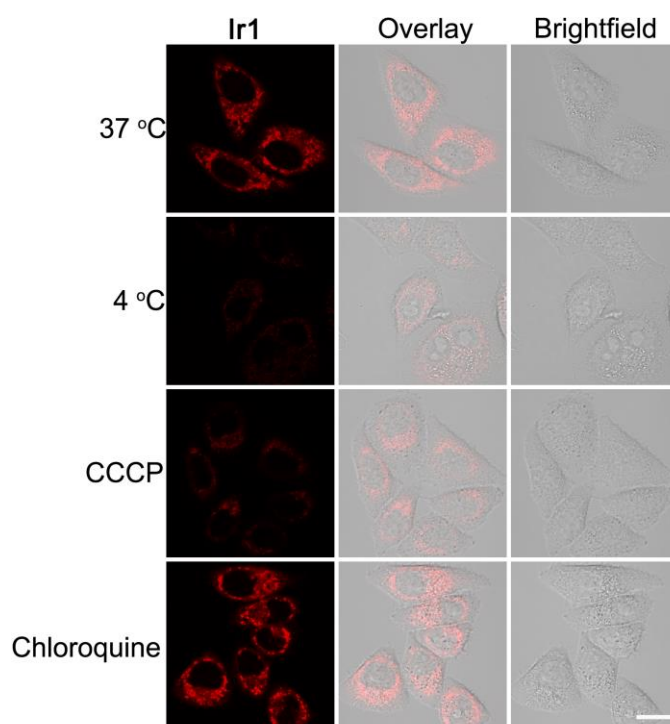

**Fig. S14** Confocal images of HeLa cells after incubation with **Ir1** (10  $\mu$ M) under different conditions. (A) Cells were incubated with **Ir1** (10  $\mu$ M) at 37 °C for 10 min. (B) Cells were incubated with **Ir1** (10  $\mu$ M) at 4 °C for 10 min. (C) Cells were pre-incubated with CCCP (10  $\mu$ M) for 1 h at 37 °C and then incubated with **Ir1** (10  $\mu$ M) at 37 °C for 10 min. (D) Cells were pre-incubated with chloroquine (50  $\mu$ M) for 1 h at 37 °C and then incubated with **Ir1** (10  $\mu$ M) at 37 °C for 10 min. Complex **Ir1** was excited at 405 nm and emission was collected at 650  $\pm$  20 nm. Scale bar: 10  $\mu$ m.

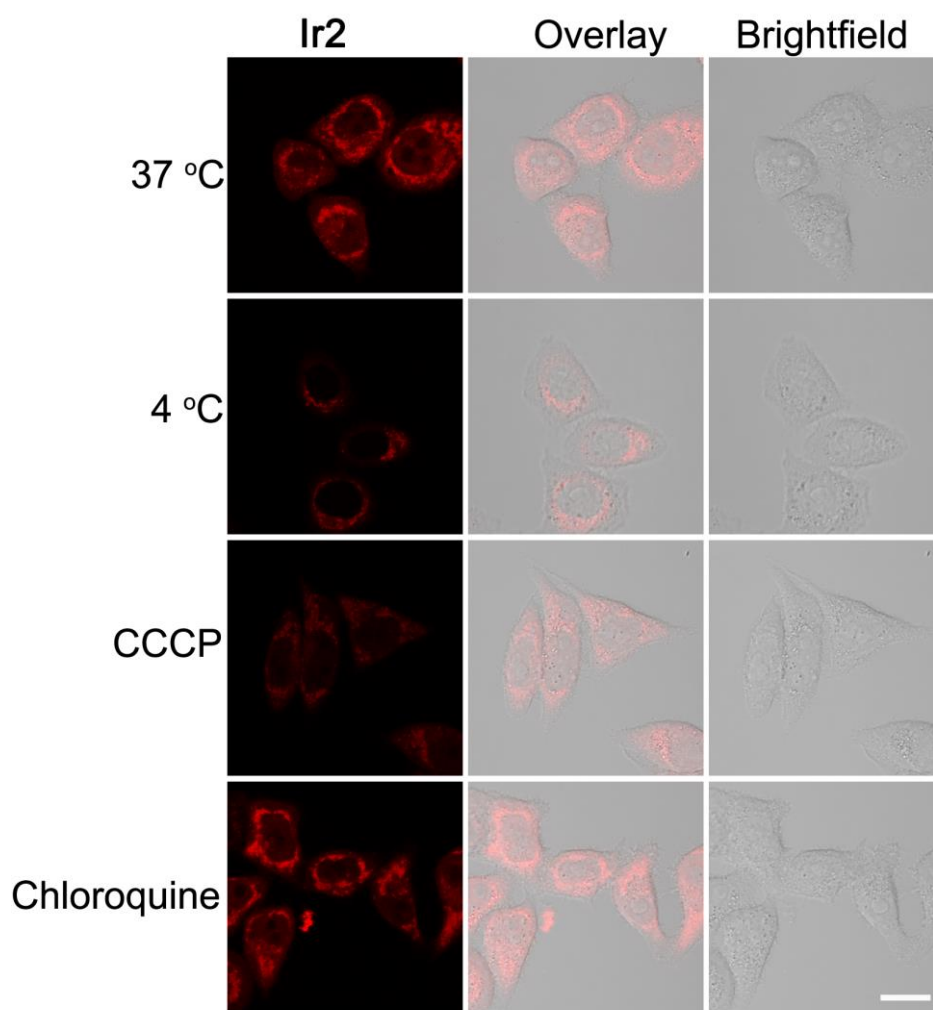

**Fig. S15** Confocal images of HeLa cells after incubation with **Ir2** (10  $\mu$ M) under different conditions. (A) Cells were incubated with **Ir2** (10  $\mu$ M) at 37 °C for 10 min. (B) Cells were incubated with **Ir2** (10  $\mu$ M) at 4 °C for 10 min. (C) Cells were pre-incubated with CCCP (10  $\mu$ M) for 1 h at 37 °C and then incubated with **Ir2** (10  $\mu$ M) at 37 °C for 10 min. (D) Cells were pre-incubated with chloroquine (50  $\mu$ M) for 1 h at 37 °C and then incubated with **Ir2** (10  $\mu$ M) at 37 °C for 10 min. Complex **Ir2** was excited at 405 nm and emission was collected at  $640 \pm 20$  nm. Scale bar: 10  $\mu$ m.

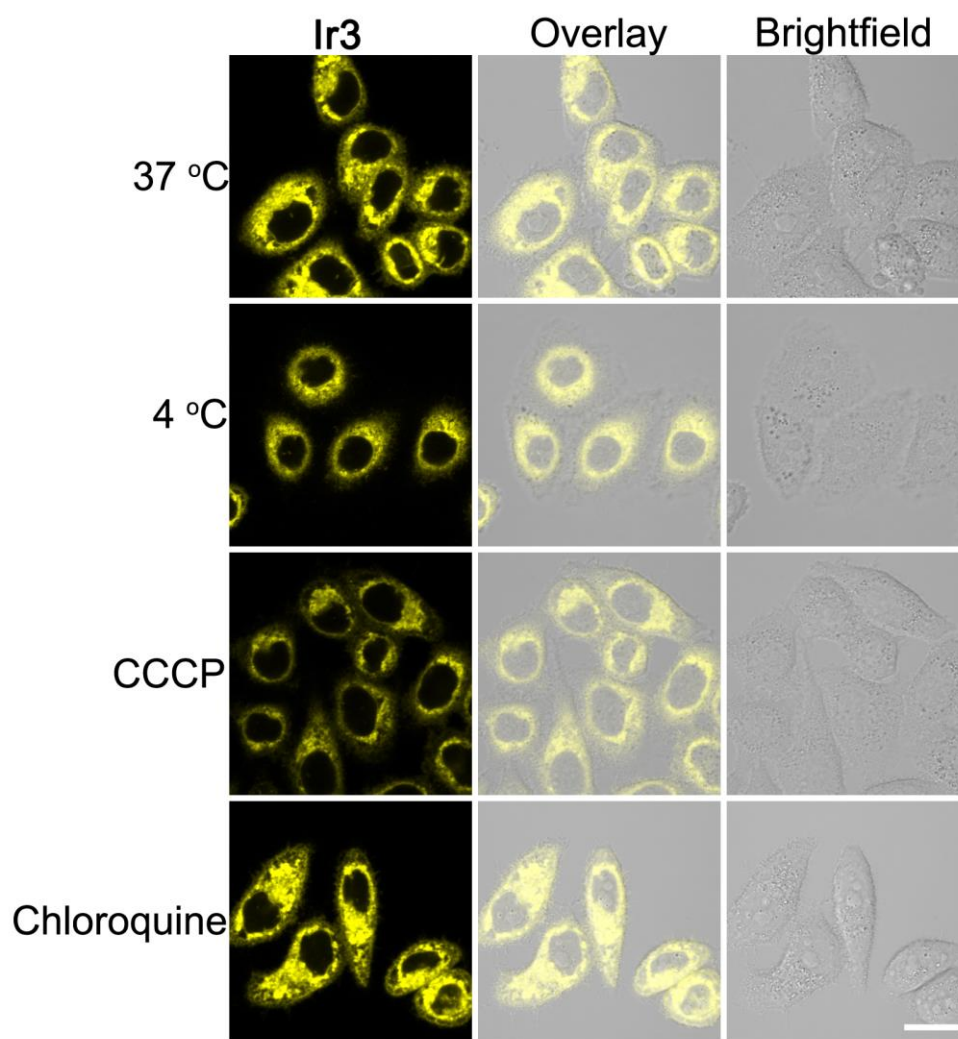

**Fig. S16** Confocal images of HeLa cells after incubation with **Ir3** (10  $\mu$ M) under different conditions. (A) Cells were incubated with **Ir3** (10  $\mu$ M) at 37 °C for 10 min. (B) Cells were incubated with **Ir3** (10  $\mu$ M) at 4 °C for 10 min. (C) Cells were pre-incubated with CCCP (10  $\mu$ M) for 1 h at 37 °C and then incubated with **Ir3** (10  $\mu$ M) at 37 °C for 10 min. (D) Cells were pre-incubated with chloroquine (50  $\mu$ M) for 1 h at 37 °C and then incubated with **Ir3** (10  $\mu$ M) at 37 °C for 10 min. Complex **Ir3** was excited at 405 nm and emission was collected at  $560 \pm 20$  nm. Scale bar: 10  $\mu$ m.

**Table S1** The different conditions and cellular uptake efficiency of complexes **Ir1–Ir3**.

| Compounds  | conditions  | Amount of iridium (ng per 10 <sup>6</sup> cells) <sup>a</sup> |
|------------|-------------|---------------------------------------------------------------|
| <b>Ir1</b> | 37 °C       | 306.29 ± 12.4                                                 |
|            | 4 °C        | 56.38 ± 6.2                                                   |
|            | CCCP        | 118.43 ± 9.7                                                  |
|            | chloroquine | 235.23 ± 10.6                                                 |
| <b>Ir2</b> | 37 °C       | 455.30 ± 16.5                                                 |
|            | 4 °C        | 114.07 ± 7.8                                                  |
|            | CCCP        | 146.40 ± 11.2                                                 |
|            | chloroquine | 375.14 ±                                                      |
| <b>Ir3</b> | 37 °C       | 183.24 ± 13.5                                                 |
|            | 4 °C        | 27.36 ± 3.1                                                   |
|            | CCCP        | 60.13 ± 5.6                                                   |
|            | chloroquine | 155.38 ± 13.3                                                 |

<sup>a</sup>Data are presented as means ± standard deviation obtained in at least three independent experiments.

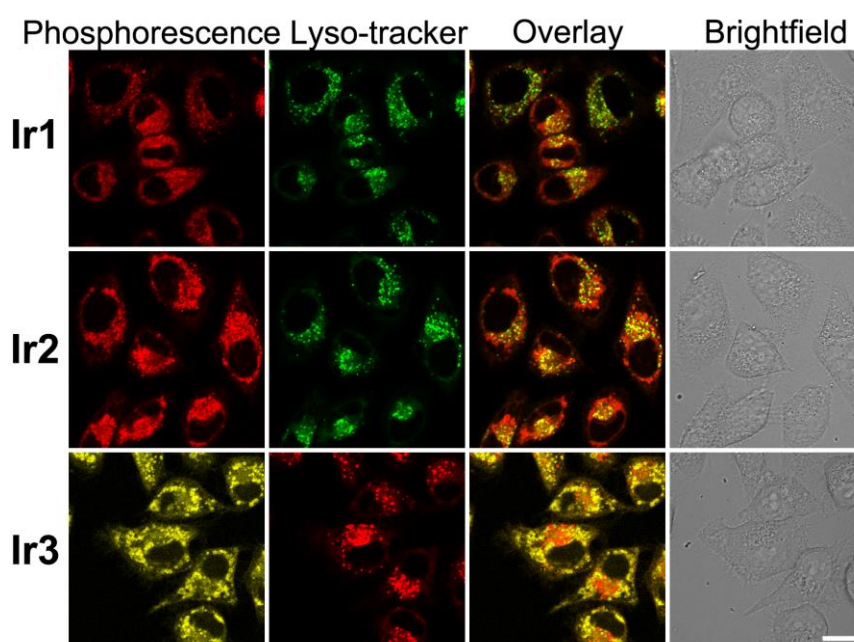

**Fig. S17** Determination of intercellular localization of complexes **Ir1–Ir3** by confocal microscopy. A549 cells were incubated with LTDR (75 nM) for 20 min and then co-incubated with **Ir1** (20 μM), **Ir2** (20 μM) and **Ir3** (20 μM) for 10 min at 37 °C. The complexes **Ir1–Ir3** were excited at 405 nm, and the emission was collected at 650 ± 20 nm, 640 ± 20 nm, 560 ± 20 nm, respectively. LTDR was excited at 630 nm and the emission was collected at 660 ± 20 nm. Scale bar: 10 μm.

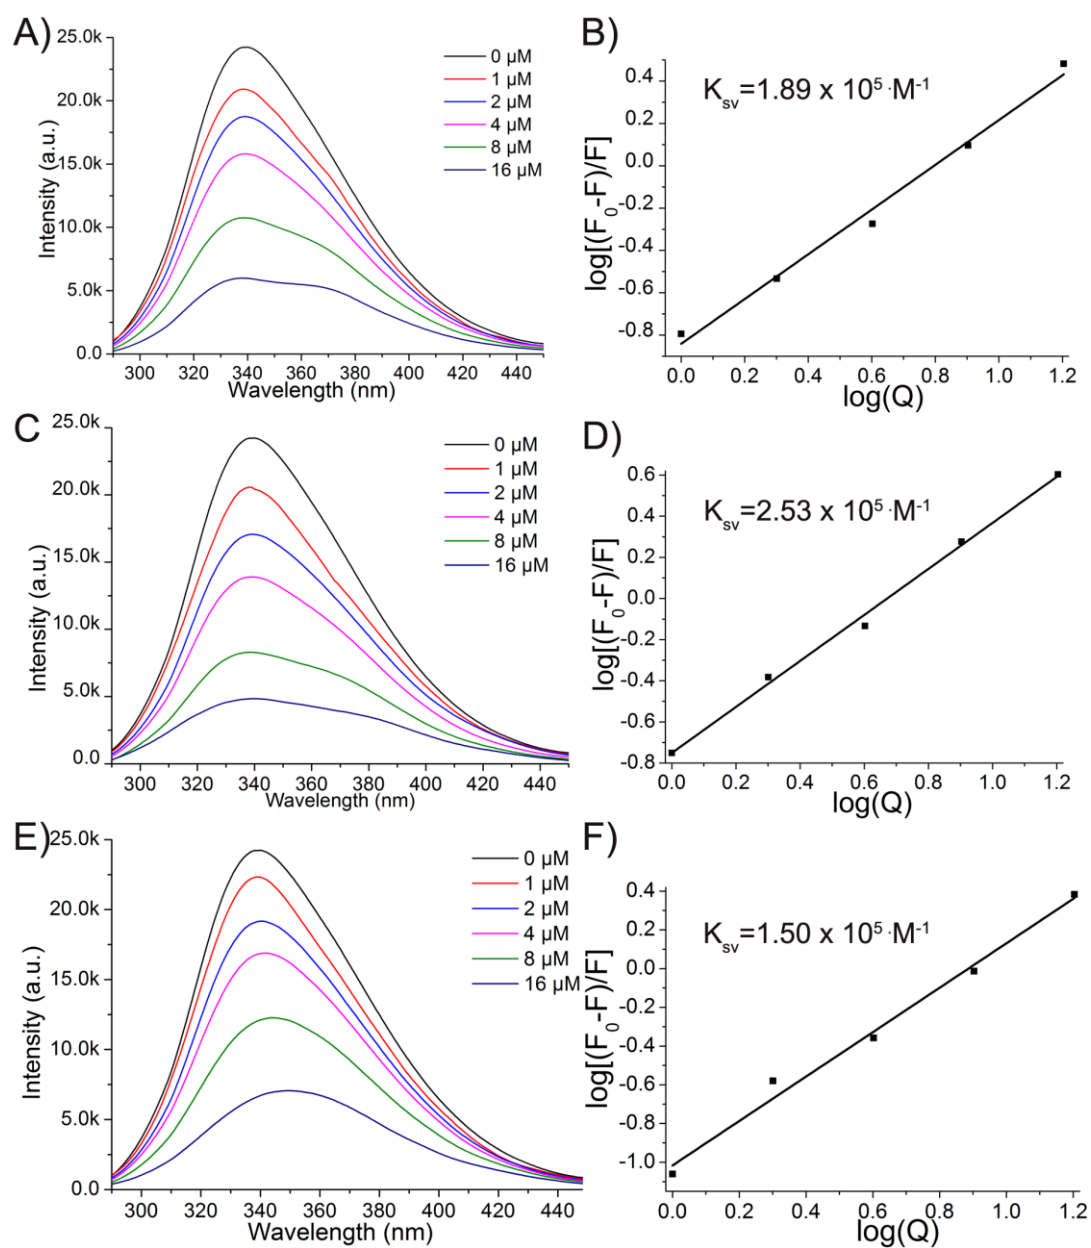

**Fig. S18** Emission spectra of BSA quenched by complexes **Ir1-Ir3**. BSA (10 μM) was incubated with the Ir(III) complexes at indicated concentrations for 30 min.  $\lambda_{ex} = 280 \text{ nm}$ .



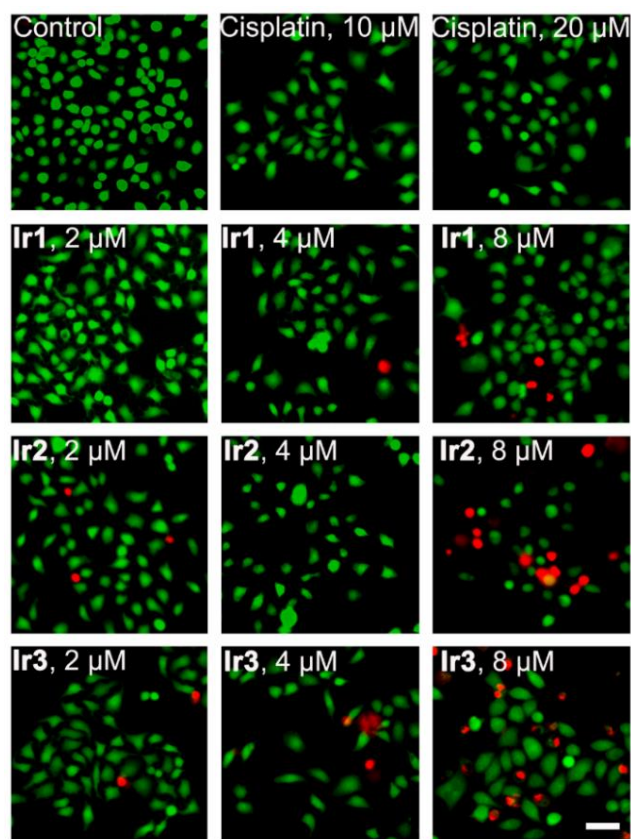

**Fig. S19** Fluorescence images of HeLa cells costained with calcein AM (staining live cells, green color) and propidium iodide (staining dead cells, red color) after treated with different complexes at indicated concentrations. Scale bar: 50  $\mu\text{m}$ .

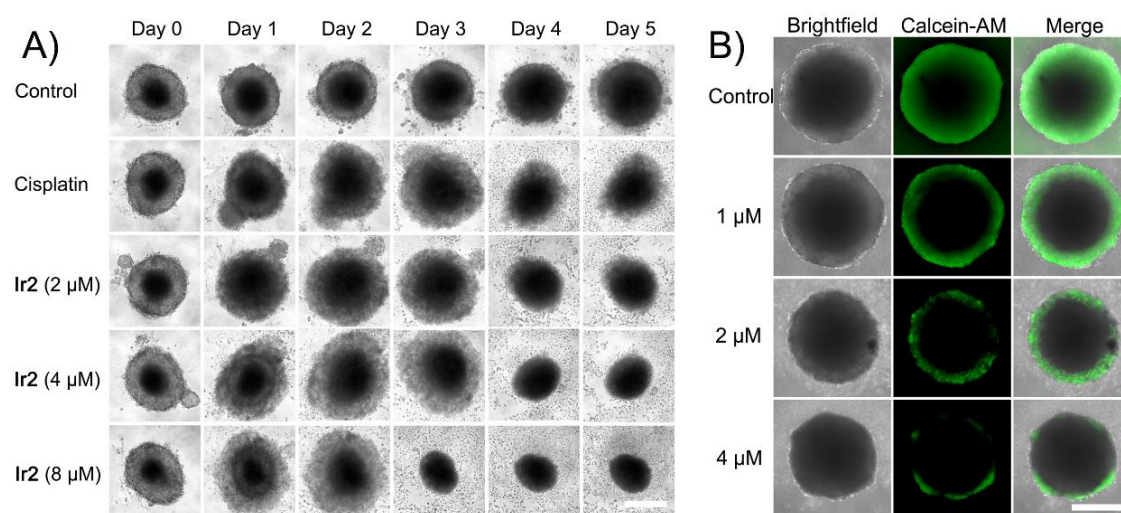

**Fig. S20** A) Growth inhibition of drug-treated HeLa MCTSs by using cisplatin (10  $\mu\text{M}$ ) and complex **Ir2** at indicated concentrations. B) HeLa MCTSs were treated with complex **Ir2** at indicated concentrations for 60 h and then stained with Calcein AM dyes ( $\lambda_{\text{ex}}=488$ ,  $\lambda_{\text{em}}=550$  nm). Scale bar: 300  $\mu\text{m}$ .

## Reference

1. E. S. Barskaya, E. K. Beloglazkina, A. G. Mazhuga, I. V. Yudin and N. V. Zyk, *Russ. Chem. Bull.* , 2015, **64**, 1975.
2. Z.-J. Yao, Y.-X. Jin, W. Deng and Z.-J. Liu, *Inorg. Chem.* , 2021, **60**, 2756.
3. Y. Li, B. Liu, C.-X. Xu, L. He, Y.-C. Wan, L.-N. Ji and Z.-W. Mao, *J. Biol. Inorg. Chem.* , 2020, **25**, 597.
4. J. J. Cao, C. P. Tan, M. H. Chen, N. Wu, D. Y. Yao, X. G. Liu, L. N. Ji and Z. W. Mao, *Chem. Sci.* , 2017, **8**, 631.
5. L. Zhang, J. Fan, J. He, W. Chen, W. Jin, Y. Zhu, H. Sun, Y. Li, Y. Shi, Y. Jing, X. Wang, S. Han and Z. Li, *J. Cell. Physiol.* , 2019, **234**, 14330.
6. Y. Li, C. P. Tan, W. Zhang, L. He, L. N. Ji and Z. W. Mao, *Biomaterials*, 2015, **39**, 95.
